# Supplementary material for: A combined experimental and theoretical study of the prototypical polymorphic transformation from marcasite to pyrite FeS2
Source: Royal Society of Chemistry journal article supplement (doi:10.1039/d4dt03447c), 2025-01-01
Supplement: d4dt03447c3.pdf [file d4dt03447c3.pdf]

## Supporting Information

### **A Combined Experimental and Theoretical Study of the Prototypical Polymorphic Transformation from Marcasite to Pyrite FeS<sub>2</sub>**

KeYuan Ma,<sup>†</sup> Ulrich Aschauer,<sup>‡</sup> and Fabian O. von Rohr\*,<sup>¶</sup>

<sup>†</sup>Max Planck Institute for Chemical Physics of Solids, 01187 Dresden, Germany

<sup>‡</sup>Department of Chemistry and Physics of Materials, University of Salzburg, 5020  
Salzburg, Austria

<sup>¶</sup>Department of Quantum Matter Physics, University of Geneva, CH-1211 Geneva,  
Switzerland

E-mail: [Fabian.vonRohr@unige.ch](mailto:Fabian.vonRohr@unige.ch)

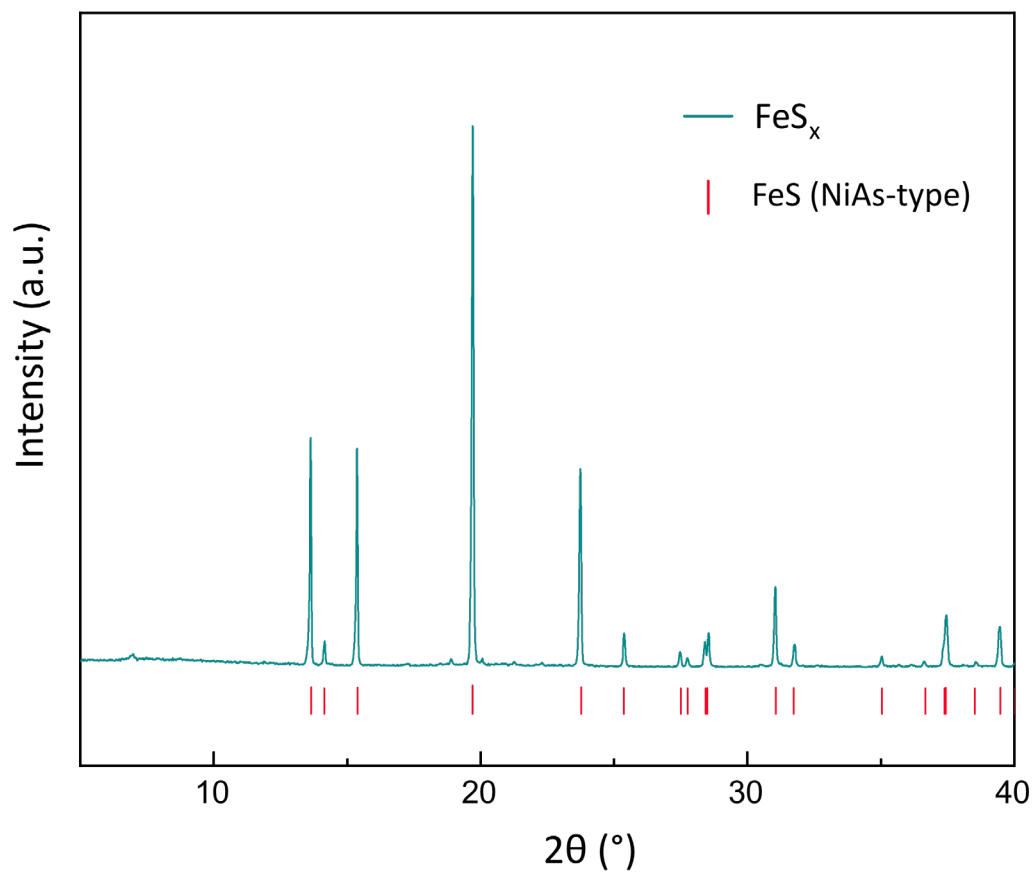

**S-Figure 1**, PXRD measurement of the residual product of FeS<sub>2</sub> marcasite after the TG-DTA measurement under argon atmosphere.

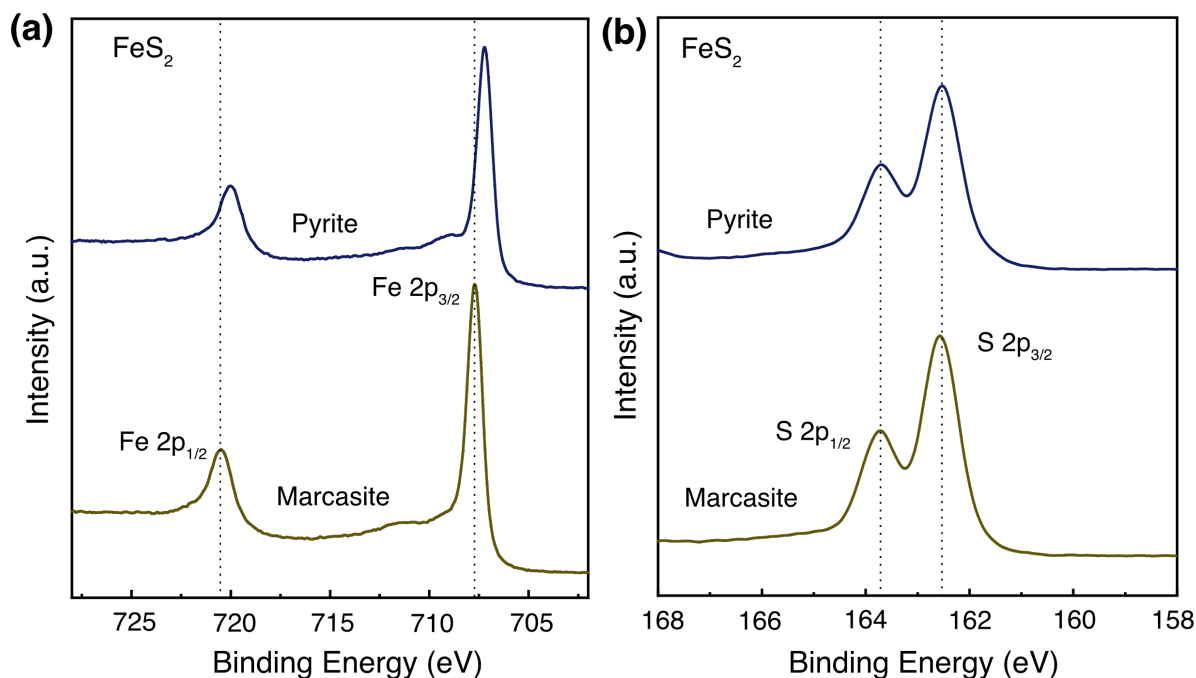

**S-Figure 2**, X-ray photoelectron spectra show marcasite has higher energy state than pyrite. Comparison of the Fe 2p (a) and S 2p (b) spectra of marcasite and pyrite, respectively.

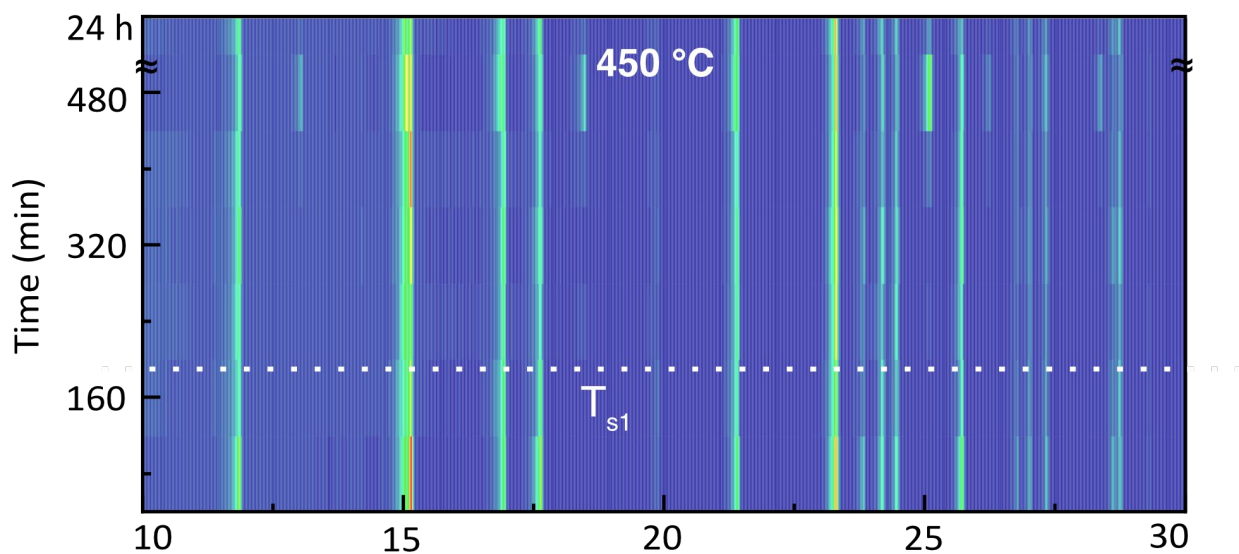

**S-Figure 3**, Isothermal annealing experiments of lab-prepared marcasite at 450 °C. The T<sub>s1</sub> line indicates the starting formation time of FeS<sub>2</sub> pyrite.

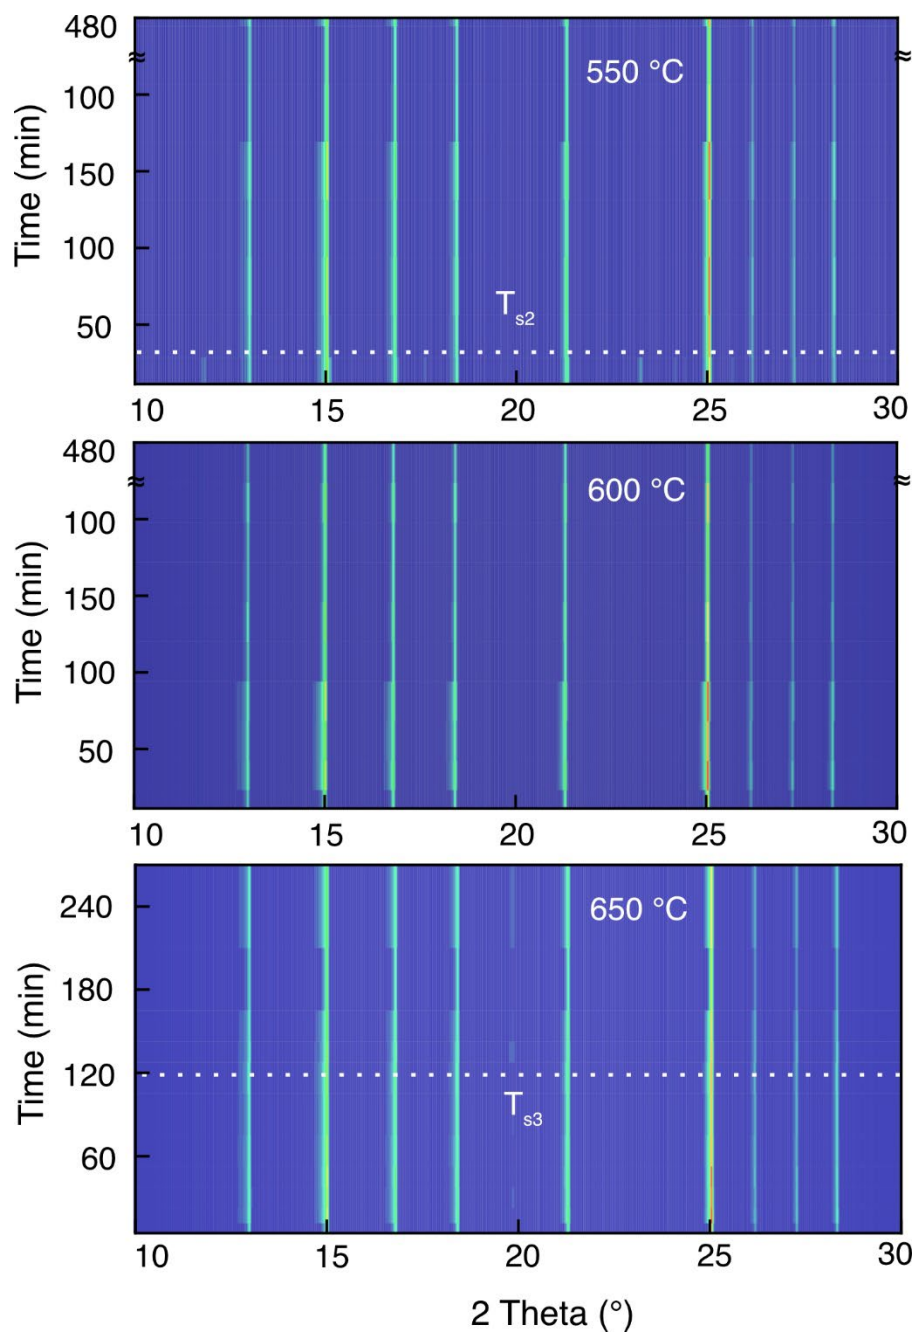

**S-Figure 4**, Isothermal annealing experiments of lab-prepared marcasite at 550 °C, 600 °C, and 650 °C, respectively.

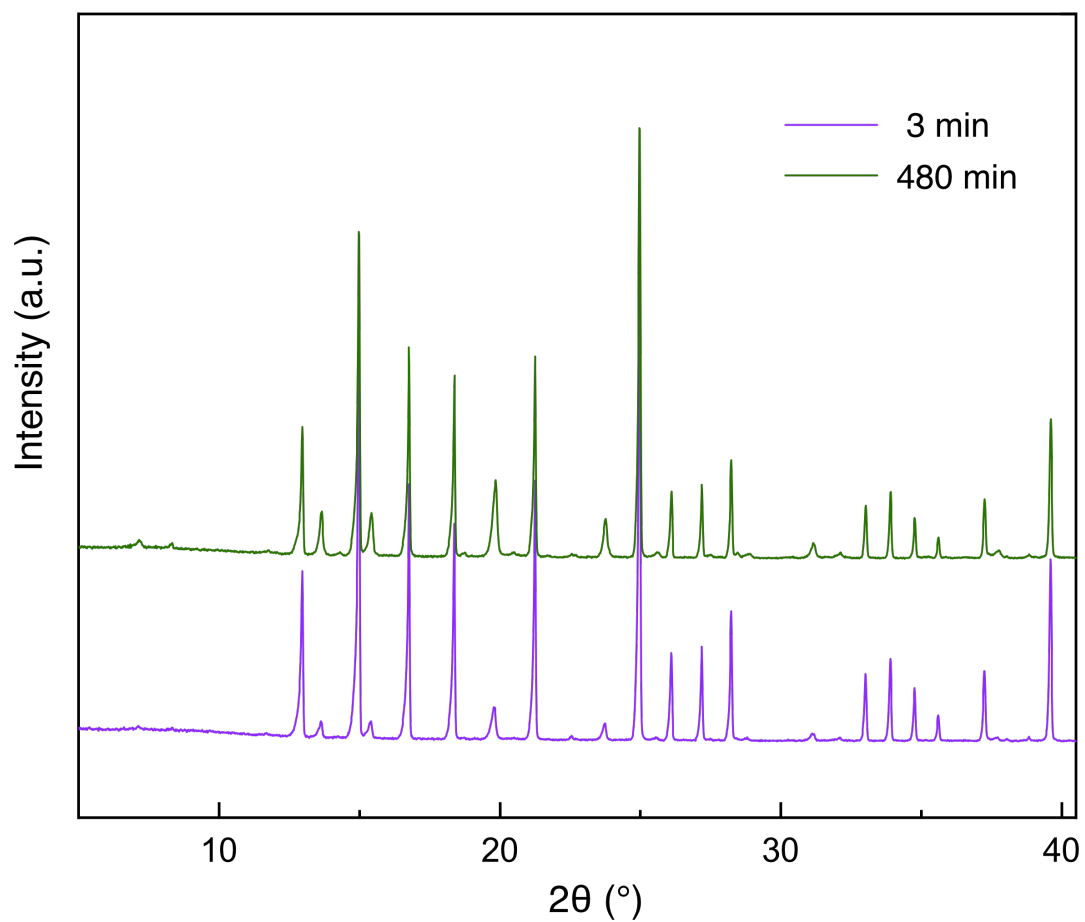

**S-Figure 5,** PXRD measurements of  $\text{FeS}_2$  marcasite after the isothermal annealing experiments at  $700^\circ\text{C}$  after 3 and 480 min, respectively. At  $700^\circ\text{C}$ , we observed the co-existence of  $\text{FeS}_2$  pyrite and the  $\text{FeS}_x$  (NiAs-type).

**Table 1:**  $\Gamma$  point phonon frequencies (in THz) in marcasite, at the two transitions states and in pyrite. The full details including the eigenvectors can be found in the phonopy YAML files in the SI.

| Mode | Marcasite | TS 1  | TS 2  | Pyrite |
|------|-----------|-------|-------|--------|
| 1    | 0.00      | -5.55 | -6.32 | 0.00   |
| 2    | 0.00      | -0.01 | -0.01 | 0.00   |
| 3    | 0.00      | -0.01 | -0.00 | 0.00   |
| 4    | 6.27      | -0.00 | -0.00 | 6.88   |
| 5    | 6.27      | 3.46  | 3.81  | 6.90   |
| 6    | 6.48      | 4.68  | 4.10  | 6.90   |
| 7    | 7.31      | 5.47  | 5.44  | 6.90   |
| 8    | 7.31      | 5.89  | 5.81  | 7.75   |
| 9    | 8.04      | 6.45  | 6.40  | 7.75   |
| 10   | 9.54      | 7.38  | 7.03  | 9.54   |
| 11   | 9.94      | 7.69  | 7.48  | 9.54   |
| 12   | 9.94      | 8.39  | 8.18  | 9.54   |
| 13   | 9.96      | 8.44  | 8.46  | 10.54  |
| 14   | 10.22     | 8.84  | 8.76  | 10.75  |
| 15   | 10.22     | 9.06  | 9.13  | 10.75  |
| 16   | 10.27     | 9.38  | 9.18  | 10.98  |
| 17   | 10.36     | 9.53  | 9.35  | 10.98  |
| 18   | 10.36     | 9.75  | 9.98  | 10.98  |
| 19   | 10.71     | 9.93  | 10.00 | 11.26  |
| 20   | 10.71     | 10.21 | 10.04 | 11.26  |
| 21   | 11.49     | 10.27 | 10.20 | 11.26  |
| 22   | 11.66     | 10.64 | 10.50 | 11.58  |
| 23   | 11.66     | 10.77 | 10.65 | 11.78  |
| 24   | 11.92     | 10.77 | 10.84 | 11.78  |
| 25   | 11.92     | 11.02 | 10.93 | 11.78  |
| 26   | 12.13     | 11.45 | 11.01 | 12.03  |
| 27   | 12.22     | 11.63 | 11.38 | 12.03  |
| 28   | 12.24     | 11.77 | 11.61 | 12.32  |
| 29   | 12.28     | 12.06 | 11.93 | 12.32  |
| 30   | 12.54     | 12.13 | 11.96 | 12.32  |
| 31   | 12.54     | 12.59 | 12.15 | 12.72  |
| 32   | 12.83     | 12.97 | 12.24 | 12.72  |
| 33   | 13.05     | 13.23 | 13.04 | 12.72  |
| 34   | 13.26     | 13.42 | 13.10 | 13.61  |
| 35   | 13.26     | 13.74 | 13.56 | 13.61  |
| 36   | 14.93     | 14.58 | 14.17 | 13.61  |
